# Supplementary material for: Synthesis and characterization of hierarchical γ-AlOOH and γ-Al2O3 microspheres with high adsorption performance for organic dyes
Source: Royal Society of Chemistry journal article supplement (doi:10.1039/c6ra17606b), 2016-01-01
Supplement: c6ra17606b1.pdf [file c6ra17606b1.pdf]

Electronic Supplementary Material (ESI) for RSC Advances.

**Synthesis and characterization of hierarchical  $\gamma$ -AlOOH and  $\gamma$ -Al<sub>2</sub>O<sub>3</sub> microspheres with high adsorption performance for organic dye**

Zhongfu Li,<sup>a</sup> Yi Du,<sup>\*a</sup> Shiyong Zhang,<sup>\*b</sup> Zhongtao Chen,<sup>a</sup> Kai Yang,<sup>a</sup> Xingjie Lv,<sup>a</sup>  
Chaofeng Zhu<sup>a</sup>

<sup>a</sup> Key Laboratory of Processing and Testing Technology of Glass & Functional Ceramics of Shandong Province, Qilu University of Technology, Jinan 250353, P. R.China.

<sup>b</sup> Hunan Key Laboratory of Applied Environmental Photocatalysis, Changsha University, Changsha, 410022, P. R. China.

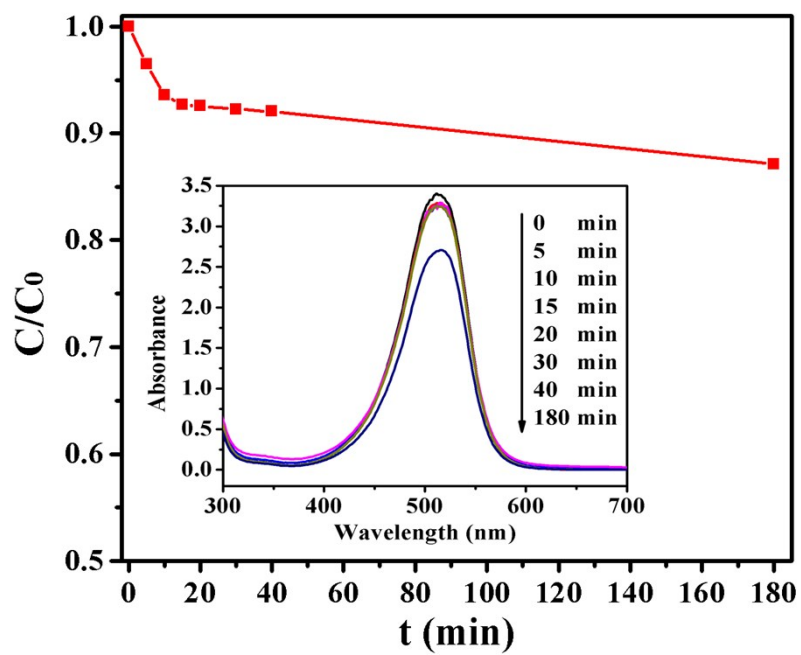

Figure S1 The adsorption effect of Safranin T with  $\gamma$ - $\text{Al}_2\text{O}_3$  as adsorbent

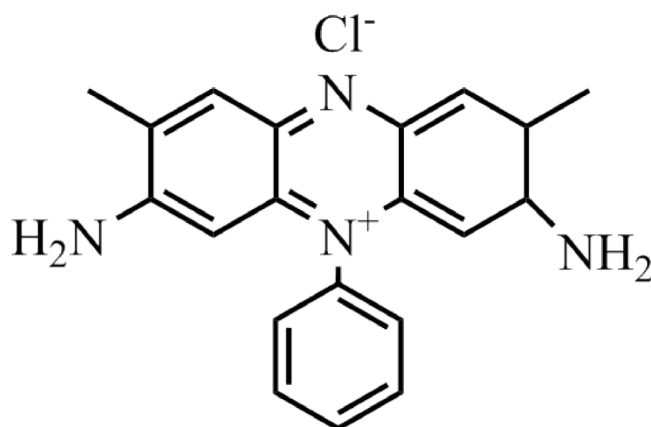

Figure S2 The constitutional formula of Safranin T.
